# Supplementary material
Source: PubMed Central journal article supplement (PMC5421647)
Supplement: Supp_Fig1.pdf [file Supp_Fig1.pdf]

## Supplementary Data

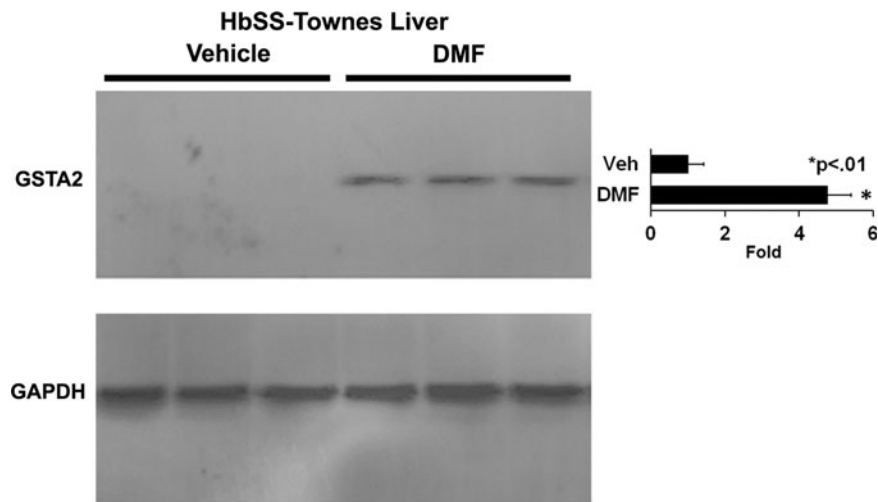

**SUPPLEMENTARY FIG. S1. GSTA2 is upregulated in liver cytosol by DMF.** HbSS-Townes sickle mice with implanted DSFCs were administered DMF (30 mg/kg) or vehicle. The mice were sacrificed, and the livers were removed and frozen 4 h after the infusion of heme and the measurement of stasis. Liver cytosols were isolated, run on a Western blot, and immunostained for GSTA2 (25 kDa) and GAPDH (36 kDa). DMF, dimethyl fumarate; DSFCs, dorsal skinfold chambers; GSTA2, glutathione S-transferase alpha 2.
