# Supplementary material
Source: PubMed Central journal article supplement (PMC5421647)
Supplement: Supp_Fig2.pdf [file Supp_Fig2.pdf]

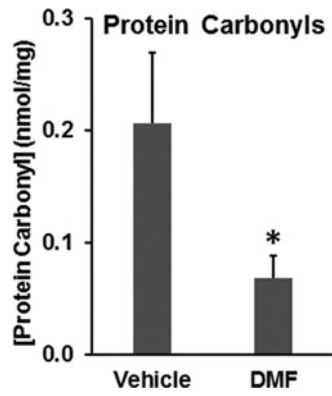

**SUPPLEMENTARY FIG. S2. Protein carbonyls, a marker of oxidative protein modification, were decreased in livers of sickle mice treated with DMF.** Protein carbonyls were measured by ELISA (Cell Biolabs) in the cytoplasm of livers from HbSS-Townes mice treated with DMF or vehicle. \* $p < 0.05$  for DMF *versus* vehicle.
