# Supplementary material
Source: PubMed Central journal article supplement (PMC5421647)
Supplement: Supp_Table1.pdf [file Supp_Table1.pdf]

SUPPLEMENTARY TABLE S1. PRIMER SEQUENCES USED FOR QUANTITATIVE RT-PCR

| <i>Gene</i>                                 | <i>Primer sequence</i>                                                                  |
|---------------------------------------------|-----------------------------------------------------------------------------------------|
| FHC                                         | Forward: 5'-GCCGAGAACTGATGAAGCTGC-3'<br>Reverse: 5'-GCACACTCCATTGCATTGAGCC-3'           |
| Ferroportin 1                               | Forward: 5'-CCATAGTCTCTGTGTCAGCCTGCT-3'<br>Reverse: 5'-CTTGCAGCAACTGTGTCAACCGT-3'       |
| GAPDH                                       | Forward: 5'-CATCACTGCCACCCAGAAGACTG-3'<br>Reverse: 5'-ATGCCAGTGAGCTTCCCCTTCAG-3'        |
| Glutamate-cysteine ligase catalytic subunit | Forward: 5'-ACACCTGGATGATGCCAACGAG-3'<br>Reverse: 5'-CCTCCATTGGTCGGAACCTTAC-3'          |
| GSTA2                                       | Forward: 5'-GAGCTTGATGCCAGCCTTCTGA-3'<br>Reverse: 5'-TTCTCTGGCTGCCAGGATGTAG-3'          |
| Glutathione S-transferase, Mu 1             | Forward: 5'-TGTTTGAGCCCAAGTGCCTGGA-3'<br>Reverse: 5'-TAGGTGTTGCGATGTAGCGGCT-3'          |
| HO-1                                        | Forward: 5'-CACTCTGGAGATGACACCTGAG-3'<br>Reverse: 5'-GTGTTCCCTCTGTCAGCATCACC-3'         |
| Haptoglobin                                 | Forward: 5'-ACGGCTATGTGGAGCACTGTGGT-3'<br>Reverse: 5'-GTTTCTCTCCAGCGACTGTGTTTC-3'       |
| Hemopexin                                   | Forward: 5'-CAG CAG TGG CGC TAA ATA TCC-3'<br>Reverse: 5'-ACT CTC CCG TTG GCA GTA GG-3' |
| Multidrug resistance-associated protein 2   | Forward: 5'-TACCAGCGAGTTATCGAAGCGTG-3'<br>Reverse: 5'-TGCTTCTGACCGCCACTGAGAT-3'         |
| NAD(P)H dehydrogenase [quinone]-1           | Forward: 5'-GCCGAACACAAGAAGCTGGAAG-3'<br>Reverse: 5'-GGCAAATCCTGCTACGAGCACT-3'          |
| Nrf2                                        | Forward: 5'-CAGCATAGAGCAGGACATGGAG-3'<br>Reverse: 5'-GAACAGCGGTAGTATCAGCCAG-3'          |
| IL-6                                        | Forward: 5'-GCTACCAAACCTGGATATAATCAGGA-3'<br>Reverse: 5'-CCAGGTAGCTATGGTACTCCAGAA-3'    |
| IL-1 $\beta$                                | Forward: 5'-TGTAATGAAAGACGGCACACC-3'<br>Reverse: 5'-TGTAATGAAAGACGGCACACC-3'            |
| IL-18                                       | Forward: 5'-TCCAGCATCAGGACAAAGAAAG-3'<br>Reverse: 5'-GCCATTGTTCCCTGGGCC-3'              |
| 18S rRNA                                    | Forward: 5'-CGGCTACCACATCCAAGGAA-3'<br>Reverse: 5'-GCTGGAATTACCGCGGCT-3'                |

FHC, ferritin heavy chain; GSTA2, glutathione S-transferase alpha 2; HO-1, heme oxygenase-1; Nrf2, nuclear factor erythroid-2-related factor-2.
